# Supplementary material
Source: PubMed Central journal article supplement (PMC3230058)
Supplement: supp_en.2011-1274_EN-11-1274SuppTab1.pdf [file supp_en.2011-1274_EN-11-1274SuppTab1.pdf]

Supplemental Table.

| Serial # | Transcription Factor (TF) | Protein/DNA Array Signal In GH+DEX Growth Condition (Fold) |              |
|----------|---------------------------|------------------------------------------------------------|--------------|
|          |                           | Men                                                        | Women        |
| 1        | AP-1                      | 1±0.08                                                     | 1.9±0.12     |
| 2        | CEBP                      | 0.97±0.15                                                  | 1.9±0.152    |
| 3        | c-Myb                     | 1.0±.2                                                     | 1.9±0.08     |
| 4        | CREB                      | 0.98±0.17                                                  | 1.96±0.12    |
| 5        | E2F1                      | 0.9±0.1                                                    | 2.6±0.15     |
| 6        | EGR                       | 0.9±0.1                                                    | 2.0±0.1      |
| 7        | AP-2                      | 0.96±0.15                                                  | 2.3±0.1      |
| 8        | GR/PR                     | Refer Fig 2B                                               | Refer Fig 2B |
| 9        | HNF4                      | Refer Fig 2A                                               | Refer Fig 2A |
| 10       | MEF-1                     | 0.92±0.08                                                  | 1.8±0.15     |
| 11       | NF-1                      | 0.9±0.1                                                    | 2.6±0.2      |
| 12       | NF-E1/YY1                 | 1.0±0.1                                                    | 1.9±0.1      |
| 13       | NFkB                      | 0.93±0.15                                                  | 1.97±0.15    |
| 14       | p53                       | 0.93±0.15                                                  | 2.3±0.15     |
| 15       | Pax-5                     | 1.06±0.15                                                  | 1.98±0.12    |
| 16       | PPAR                      | 1.01±0.12                                                  | 1.8±0.15     |
| 17       | RAR/DR-5                  | 0.97±0.15                                                  | 1.8±0.15     |
| 18       | RXR                       | Refer Fig 2C                                               | Refer Fig 2C |
| 19       | SMAD-3/4                  | 0.97±0.15                                                  | 1.78±0.17    |
| 20       | Sp-1                      | 0.92±0.15                                                  | 1.83±0.15    |
| 21       | STAT3                     | 0.97±0.15                                                  | 1.8±0.15     |

|    |          |           |          |
|----|----------|-----------|----------|
| 22 | STAT4    | 0.92±0.12 | 1.9±0.15 |
| 23 | TFIID    | 0.94±0.07 | 1.8±0.11 |
| 24 | TR       | 0.96±0.15 | 1.6±0.12 |
| 25 | TR/DR-4  | 0.98±.1   | 1.8±0.12 |
| 26 | USF-1    | 0.97±0.15 | 2.3±0.15 |
| 27 | VDR/DR-3 | 1.0±0.08  | 1.7±0.12 |
| 28 | MRE      | 0.85±0.07 | 1.6±0.1  |
